# Supplementary material for: Strategic design of small and versatile bicyclic organic superbases: a density functional study
Source: Royal Society of Chemistry journal article supplement (doi:10.1039/b713499a), 2007-10-26
Supplement: b713499a.pdf [file b713499a.pdf]

## Supporting Information: Strategic Design of a Small and Versatile Bicyclic Superorganic Base: A Density Functional Study

*Ajeet Singh and Bishwajit Ganguly\**

**B3LYP/6-311+G\*\*//B3LYP/6-31+G\* SCF energies, B3LYP/6-31+G\* zero point vibrational energies (ZPVE), and Cartesian coordinates for 1-7 and their monoprotonated ions**

**7**

SCF ENERGY at B3LYP/6-311+G\*\* = -502.66563au  
ZPVE = 190.133 kcal/mol

| atom | x             | y             | z             |
|------|---------------|---------------|---------------|
| C1   | -0.6951057180 | -0.9178814080 | -0.0841621238 |
| C2   | -0.7705503133 | 0.5005563685  | -0.7407675674 |
| C3   | 0.7137270750  | 0.5613615769  | -0.2493687992 |
| C4   | 0.8195527134  | -0.9838380214 | -0.4718131437 |
| C5   | -0.5847117829 | -0.5278145422 | 1.4048208655  |
| H6   | -1.3960442910 | -1.7158953596 | -0.3403217352 |
| N7   | -1.0203601130 | 0.5855862578  | -2.1667229275 |
| H8   | 1.4380257218  | 1.2615904731  | -0.6721139628 |
| C9   | 0.4995608916  | 0.6068771791  | 1.2783819645  |
| N10  | 1.1640652621  | -1.4658836727 | -1.7954410833 |
| H11  | -1.5338295526 | -0.1605806559 | 1.8104733344  |
| H12  | -0.2493987862 | -1.3631695268 | 2.0292676603  |
| H13  | 1.4156015491  | 0.3783588389  | 1.8341469246  |
| H14  | 0.1311984587  | 1.5813562080  | 1.6172978939  |
| C15  | -2.3777015743 | 0.1738058179  | -2.4975526225 |
| C16  | -0.7478270425 | 1.9231820318  | -2.6747487154 |
| C17  | 2.5433986675  | -1.1481285239 | -2.1385551247 |
| C18  | 0.9167899454  | -2.8958489118 | -1.9206796209 |
| H19  | -2.5215048603 | 0.2249805246  | -3.5825889344 |
| H20  | -2.5482928363 | -0.8599697807 | -2.1831683962 |
| H21  | -3.1504413222 | 0.8127014278  | -2.0185107203 |
| H22  | -0.9144330212 | 1.9445628447  | -3.7575016107 |
| H23  | -1.3947800609 | 2.6993489879  | -2.2123335892 |
| H24  | 0.2952364530  | 2.1954118389  | -2.4884169983 |
| H25  | 2.7592053967  | -1.5032882290 | -3.1524095190 |
| H26  | 2.6999652498  | -0.0656921369 | -2.1199711306 |
| H27  | 3.2776685815  | -1.6155119996 | -1.4477790307 |
| H28  | 1.1546728051  | -3.2209389031 | -2.9396574119 |
| H29  | 1.5262246122  | -3.5014413132 | -1.2159048828 |
| H30  | -0.1382269212 | -3.1168642392 | -1.7336188930 |
| H31  | -1.4447414485 | 1.2011961608  | -0.1998603937 |
| H32  | 1.4489363716  | -1.4965483527 | 0.2891151649  |

**7H<sup>+</sup>**

SCF ENERGY at B3LYP/6-311+G\*\* = -503.07733au  
ZPVE = 198.854 kcal/mol

| atom | x             | y             | z            |
|------|---------------|---------------|--------------|
| C1   | -0.6950180000 | -0.9130460000 | 0.0190740000 |

|     |               |               |               |
|-----|---------------|---------------|---------------|
| C2  | -0.7632590000 | 0.5006600000  | -0.6381340000 |
| C3  | 0.7153880000  | 0.5770380000  | -0.1448600000 |
| C4  | 0.8111170000  | -0.9645380000 | -0.4121400000 |
| C5  | -0.5737510000 | -0.5262740000 | 1.5072720000  |
| H6  | -1.4026700000 | -1.7061500000 | -0.2299240000 |
| N7  | -0.9195780000 | 0.4829910000  | -2.1407900000 |
| H8  | 1.4319050000  | 1.2887670000  | -0.5593960000 |
| C9  | 0.5019700000  | 0.6092950000  | 1.3823540000  |
| N10 | 1.0467510000  | -1.3424020000 | -1.8178600000 |
| H11 | -1.5223700000 | -0.1721850000 | 1.9220190000  |
| H12 | -0.2352400000 | -1.3697370000 | 2.1155130000  |
| H13 | 1.4257530000  | 0.3834040000  | 1.9223580000  |
| H14 | 0.1389710000  | 1.5814220000  | 1.7294300000  |
| C15 | -2.2784930000 | 0.0198760000  | -2.5649000000 |
| C16 | -0.5905780000 | 1.8048210000  | -2.7614520000 |
| C17 | 2.4314890000  | -1.0318200000 | -2.2268820000 |
| C18 | 0.7753880000  | -2.7777840000 | -2.0348940000 |
| H19 | -2.3144120000 | -0.0178040000 | -3.6553150000 |
| H20 | -2.4674570000 | -0.9725320000 | -2.1566140000 |
| H21 | -3.0289180000 | 0.7222570000  | -2.1940430000 |
| H22 | -0.6742720000 | 1.7163610000  | -3.8463120000 |
| H23 | -1.2935860000 | 2.5574330000  | -2.3962750000 |
| H24 | 0.4267640000  | 2.0885340000  | -2.4934200000 |
| H25 | 2.5661580000  | -1.3007660000 | -3.2781880000 |
| H26 | 2.6342180000  | 0.0361910000  | -2.1145290000 |
| H27 | 3.1670870000  | -1.5905830000 | -1.6270310000 |
| H28 | 0.9352560000  | -3.0198850000 | -3.0891890000 |
| H29 | 1.4387040000  | -3.4128970000 | -1.4267900000 |
| H30 | -0.2601560000 | -3.0152890000 | -1.7787380000 |
| H31 | -1.4821620000 | 1.2248300000  | -0.2400570000 |
| H32 | 1.4800700000  | -1.5238460000 | 0.2615250000  |
| H33 | -0.1867190000 | -0.2415930000 | -2.4259140000 |

## 8

SCF ENERGY at B3LYP/6-311+G\*\* = -581.29212 au  
ZPVE = 218.478kcal/mol

| atom | x             | y             | z             |
|------|---------------|---------------|---------------|
| C1   | -0.6949071290 | -0.8969786672 | 0.0406165934  |
| C2   | -0.7892055432 | 0.5294064049  | -0.6430051795 |
| C3   | 0.7073075616  | 0.5789374149  | -0.1251609277 |
| C4   | 0.8331239094  | -0.9819707970 | -0.3684924240 |
| C5   | -0.5847834130 | -0.5090805524 | 1.5325699622  |
| H6   | -1.3988034897 | -1.6978054878 | -0.2037097369 |
| N7   | -0.9230436556 | 0.4971976129  | -2.1021242596 |
| C8   | -1.7998549670 | 1.5522244791  | -0.0718249604 |
| H9   | 1.4336084045  | 1.2842613452  | -0.5392042776 |
| C10  | 0.4938473631  | 0.6291248464  | 1.4045532863  |
| N11  | 1.0644009117  | -1.3631291928 | -1.7646031464 |
| C12  | 1.7920945273  | -1.7925840705 | 0.5356738774  |
| H13  | -1.5347931077 | -0.1580717997 | 1.9447961580  |
| H14  | -0.2568555151 | -1.3444271805 | 2.1573636207  |
| H15  | 1.4105783383  | 0.4186818735  | 1.9621886239  |
| H16  | 0.1331007160  | 1.6041779429  | 1.7434701969  |
| C17  | -2.1569233031 | -0.0560827639 | -2.6224809790 |
| C18  | -0.5227740178 | 1.6967607950  | -2.8096863954 |
| C19  | 2.3349921980  | -0.9673277705 | -2.3374902747 |
| C20  | 0.7011936235  | -2.7181038070 | -2.1279494946 |
| H21  | -2.0212977159 | -0.3045243895 | -3.6836102422 |
| H22  | -2.4152747615 | -0.9796436355 | -2.0960308505 |
| H23  | -3.0285841156 | 0.6280072841  | -2.5561281464 |
| H24  | -0.3714017402 | 1.4562403659  | -3.8705563449 |
| H25  | -1.2629263169 | 2.5227168002  | -2.7644351658 |

|     |               |               |               |
|-----|---------------|---------------|---------------|
| H26 | 0.4254389575  | 2.0754643155  | -2.4165678869 |
| H27 | 2.2721284872  | -1.0305161823 | -3.4320994468 |
| H28 | 2.5664475557  | 0.0699194310  | -2.0779384753 |
| H29 | 3.1941029234  | -1.5959625029 | -2.0229268778 |
| H30 | 0.6243673507  | -2.7900692339 | -3.2211592277 |
| H31 | 1.4283491155  | -3.4899344717 | -1.8000283506 |
| H32 | -0.2752289503 | -2.9787419686 | -1.7086744712 |
| H33 | -1.6026154177 | 2.5453410174  | -0.4933610789 |
| H34 | -2.8184154142 | 1.2718493816  | -0.3664543150 |
| H35 | -1.8023851419 | 1.6627496747  | 1.0125788222  |
| H36 | 2.8307539765  | -1.6057158465 | 0.2371520265  |
| H37 | 1.7266743185  | -1.5849964351 | 1.6037551587  |
| H38 | 1.6061784920  | -2.8657807425 | 0.4069908270  |

## 8H<sup>+</sup>

SCF ENERGY at B3LYP/6-311+G\*\* = -581.71529au

ZPVE = 228.604kcal/mol

| atom | x             | y             | z             |
|------|---------------|---------------|---------------|
| C1   | -0.7064760000 | -0.8906140000 | 0.0847820000  |
| C2   | -0.7942690000 | 0.5320190000  | -0.6111790000 |
| C3   | 0.7001770000  | 0.5949780000  | -0.0833640000 |
| C4   | 0.8216550000  | -0.9643250000 | -0.3121540000 |
| C5   | -0.5931920000 | -0.4962180000 | 1.5744980000  |
| H6   | -1.4049500000 | -1.6970090000 | -0.1531630000 |
| N7   | -0.8662180000 | 0.4309150000  | -2.1099180000 |
| C8   | -1.8146420000 | 1.5568050000  | -0.1030030000 |
| H9   | 1.4305880000  | 1.2978720000  | -0.4922880000 |
| C10  | 0.4825930000  | 0.6410960000  | 1.4457250000  |
| N11  | 1.0068550000  | -1.3080470000 | -1.7949600000 |
| C12  | 1.8026340000  | -1.8020020000 | 0.5062890000  |
| H13  | -1.5466720000 | -0.1489680000 | 1.9776480000  |
| H14  | -0.2701730000 | -1.3309630000 | 2.2009420000  |
| H15  | 1.4003980000  | 0.4362810000  | 2.0018170000  |
| H16  | 0.1239470000  | 1.6179070000  | 1.7765930000  |
| C17  | -2.1532750000 | -0.0812760000 | -2.6238270000 |
| C18  | -0.4944710000 | 1.6713880000  | -2.8212600000 |
| C19  | 2.3397680000  | -0.9377720000 | -2.3588070000 |
| C20  | 0.6588190000  | -2.7151860000 | -2.1559540000 |
| H21  | -2.0334450000 | -0.3370410000 | -3.6815050000 |
| H22  | -2.4506390000 | -0.9811670000 | -2.0803880000 |
| H23  | -2.9614710000 | 0.6572200000  | -2.5448240000 |
| H24  | -0.3531880000 | 1.4403020000  | -3.8819600000 |
| H25  | -1.2669350000 | 2.4474560000  | -2.7449330000 |
| H26  | 0.4414710000  | 2.0727070000  | -2.4255660000 |
| H27  | 2.2789240000  | -0.9932610000 | -3.4482820000 |
| H28  | 2.5953320000  | 0.0793560000  | -2.0618770000 |
| H29  | 3.1096870000  | -1.6274660000 | -2.0088310000 |
| H30  | 0.5890170000  | -2.7832140000 | -3.2441670000 |
| H31  | 1.4292280000  | -3.4033050000 | -1.8039250000 |
| H32  | -0.3013470000 | -2.9816710000 | -1.7142150000 |
| H33  | -1.6142940000 | 2.5454120000  | -0.5288910000 |
| H34  | -2.8301340000 | 1.2681340000  | -0.3931600000 |
| H35  | -1.8189870000 | 1.6756840000  | 0.9788810000  |
| H36  | 2.8391540000  | -1.5962810000 | 0.2194050000  |
| H37  | 1.7303050000  | -1.6023680000 | 1.5732460000  |
| H38  | 1.6179230000  | -2.8733480000 | 0.3752070000  |
| H39  | 0.2471460000  | -0.6384960000 | -2.2280530000 |

## 9

SCF ENERGY at B3LYP/6-311+G\*\* = -957.62808 au

ZPVE = 314.602 kcal/mol

| atom | x             | y             | z             |
|------|---------------|---------------|---------------|
| C1   | -0.9734070000 | -1.4469630000 | -0.7970820000 |
| C2   | -1.1809200000 | 0.1090680000  | -0.9185700000 |
| C3   | 0.1004340000  | 0.1139390000  | -0.0136630000 |
| C4   | 0.5801890000  | -1.2058250000 | -0.7128840000 |
| C5   | -1.3040240000 | -1.6564860000 | 0.6938460000  |
| H6   | -1.4057110000 | -2.1402190000 | -1.5261550000 |
| N7   | -1.0394260000 | 0.7204530000  | -2.2070910000 |
| H8   | 0.7496490000  | 0.9917440000  | 0.0393680000  |
| C9   | -0.4782200000 | -0.4560230000 | 1.2956050000  |
| N10  | 1.3138760000  | -1.0367610000 | -1.9323910000 |
| H11  | -2.3775040000 | -1.5739040000 | 0.9010540000  |
| H12  | -0.9632140000 | -2.6297060000 | 1.0664040000  |
| H13  | 0.3019510000  | -0.7903800000 | 1.9893580000  |
| H14  | -1.1123580000 | 0.2654600000  | 1.8239000000  |
| C15  | 2.2480260000  | -1.8561300000 | -2.2619270000 |
| C16  | -2.0247360000 | 1.3332400000  | -2.7604990000 |
| N17  | 3.1825740000  | -1.4757300000 | -3.2419090000 |
| N18  | 2.4897330000  | -3.1251590000 | -1.7037660000 |
| N19  | -3.3797550000 | 1.2550370000  | -2.3888630000 |
| N20  | -1.7736470000 | 2.2238100000  | -3.8199390000 |
| C21  | 3.3862030000  | -2.3780700000 | -4.3730520000 |
| C22  | 3.1751830000  | -0.0711640000 | -3.6336130000 |
| C23  | 3.8285100000  | -3.6269050000 | -1.4552710000 |
| C24  | 1.4175210000  | -4.0782270000 | -1.4919580000 |
| C25  | -4.2604220000 | 2.4082820000  | -2.4000970000 |
| C26  | -4.0231180000 | -0.0181760000 | -2.1282500000 |
| C27  | -2.5187440000 | 2.0287160000  | -5.0616980000 |
| C28  | -0.3786700000 | 2.5819260000  | -4.0483480000 |
| H29  | 2.6167140000  | -2.2309880000 | -5.1513740000 |
| H30  | 4.3683860000  | -2.1925960000 | -4.8237840000 |
| H31  | 3.3467840000  | -3.4186770000 | -4.0473260000 |
| H32  | 4.0981640000  | 0.1391710000  | -4.1871500000 |
| H33  | 2.3097880000  | 0.1808090000  | -4.2655570000 |
| H34  | 3.1296270000  | 0.5586460000  | -2.7441760000 |
| H35  | 3.9123030000  | -3.9782410000 | -0.4154870000 |
| H36  | 4.0869820000  | -4.4749470000 | -2.1125900000 |
| H37  | 4.5565300000  | -2.8303600000 | -1.6157190000 |
| H38  | 1.6002470000  | -4.9967870000 | -2.0750250000 |
| H39  | 1.3257390000  | -4.3667580000 | -0.4337230000 |
| H40  | 0.4676850000  | -3.6528810000 | -1.8175890000 |
| H41  | -4.7732280000 | 2.5002040000  | -1.4304720000 |
| H42  | -3.6790820000 | 3.3145020000  | -2.5763430000 |
| H43  | -5.0381660000 | 2.3342650000  | -3.1796530000 |
| H44  | -4.8589200000 | -0.1763220000 | -2.8307510000 |
| H45  | -3.3101350000 | -0.8326590000 | -2.2602120000 |
| H46  | -4.4298830000 | -0.0729370000 | -1.1069470000 |
| H47  | -2.0544740000 | 1.2516170000  | -5.6942490000 |
| H48  | -3.5461450000 | 1.7277030000  | -4.8509860000 |
| H49  | -2.5415810000 | 2.9650840000  | -5.6316880000 |
| H50  | -0.3491740000 | 3.4592730000  | -4.7055600000 |
| H51  | 0.1005500000  | 2.8197800000  | -3.0977710000 |
| H52  | 0.1911210000  | 1.7629820000  | -4.5135670000 |
| H53  | -2.0832260000 | 0.4718820000  | -0.3974340000 |
| H54  | 1.0939910000  | -1.9001880000 | -0.0264170000 |

## 9H<sup>+</sup>

SCF ENERGY at B3LYP/6-311+G\*\* = -958.07671 au  
ZPVE = 325.658 kcal/mol

| atom | x             | y             | z             |
|------|---------------|---------------|---------------|
| C1   | 0.0894560000  | 2.0605730000  | -0.4538720000 |
| C2   | 1.1227520000  | 1.3158250000  | 0.4793360000  |
| C3   | 0.0161340000  | 1.6108160000  | 1.5547760000  |
| C4   | -1.0435960000 | 1.4287410000  | 0.4202120000  |
| C5   | 0.1341780000  | 3.4897250000  | 0.1165710000  |
| H6   | 0.1038890000  | 1.9331800000  | -1.5401550000 |
| N7   | 1.3289050000  | -0.0937330000 | 0.2272240000  |
| H8   | -0.0407490000 | 1.0336030000  | 2.4812420000  |
| C9   | 0.0763540000  | 3.1459060000  | 1.6501640000  |
| N10  | -1.3699520000 | 0.0332250000  | 0.1288550000  |
| H11  | 1.0519420000  | 4.0157920000  | -0.1644580000 |
| H12  | -0.7137540000 | 4.1009920000  | -0.2116110000 |
| H13  | -0.8024440000 | 3.5716840000  | 2.1461790000  |
| H14  | 0.9637470000  | 3.4858970000  | 2.1931950000  |
| C15  | -2.5809230000 | -0.4792870000 | -0.0990690000 |
| C16  | 2.5231960000  | -0.5417390000 | -0.0526190000 |
| N17  | -2.8258050000 | -1.7730820000 | 0.2298960000  |
| N18  | -3.5773650000 | 0.2697570000  | -0.6409700000 |
| N19  | 3.5870780000  | 0.2274250000  | -0.5056090000 |
| N20  | 2.8103870000  | -1.8819440000 | 0.1455350000  |
| C21  | -3.6928900000 | -2.6355220000 | -0.5798190000 |
| C22  | -2.0612480000 | -2.4607150000 | 1.2730040000  |
| C23  | -4.9797940000 | 0.1112510000  | -0.2464160000 |
| C24  | -3.3249600000 | 1.2924480000  | -1.6597360000 |
| C25  | 4.9609840000  | 0.0062710000  | -0.0655680000 |
| C26  | 3.4210340000  | 1.2503250000  | -1.5290940000 |
| C27  | 3.5494340000  | -2.6506200000 | -0.8556770000 |
| C28  | 1.9387400000  | -2.6862690000 | 0.9843120000  |
| H29  | -3.1304080000 | -3.5292390000 | -0.8731190000 |
| H30  | -4.5776480000 | -2.9512610000 | -0.0153700000 |
| H31  | -4.0075120000 | -2.1152590000 | -1.4843070000 |
| H32  | -2.7363270000 | -3.1308570000 | 1.8148320000  |
| H33  | -1.2460320000 | -3.0588030000 | 0.8479270000  |
| H34  | -1.6468210000 | -1.7353850000 | 1.9745310000  |
| H35  | -5.3885240000 | 1.0972180000  | 0.0017910000  |
| H36  | -5.5822030000 | -0.3174960000 | -1.0562470000 |
| H37  | -5.0538540000 | -0.5258870000 | 0.6352070000  |
| H38  | -3.9910060000 | 1.1133050000  | -2.5117180000 |
| H39  | -3.5209840000 | 2.2997220000  | -1.2742880000 |
| H40  | -2.2934290000 | 1.2332270000  | -2.0058300000 |
| H41  | 5.3880310000  | 0.9536810000  | 0.2892290000  |
| H42  | 4.9788720000  | -0.7122100000 | 0.7547480000  |
| H43  | 5.6000260000  | -0.3672560000 | -0.8789020000 |
| H44  | 4.1037770000  | 1.0488980000  | -2.3667760000 |
| H45  | 2.4004590000  | 1.2367320000  | -1.9127990000 |
| H46  | 3.6447310000  | 2.2562830000  | -1.1477030000 |
| H47  | 2.8634330000  | -3.2924260000 | -1.4293510000 |
| H48  | 4.0545710000  | -1.9841100000 | -1.5540100000 |
| H49  | 4.2974260000  | -3.2915200000 | -0.3744310000 |
| H50  | 2.5112680000  | -3.5320990000 | 1.3810820000  |
| H51  | 1.5640980000  | -2.0850980000 | 1.8139500000  |
| H52  | 1.0807250000  | -3.0899640000 | 0.4223760000  |
| H53  | -0.5305790000 | -0.5685530000 | 0.1548740000  |
| H54  | 2.0655280000  | 1.8542130000  | 0.6421200000  |
| H55  | -1.9732480000 | 1.9937960000  | 0.5242900000  |

SCF ENERGY at B3LYP/6-311+G\*\* = -1036.25048 au  
ZPVE = 338.051 kcal/mol

| atom | x             | y             | z             |
|------|---------------|---------------|---------------|
| C1   | -0.8072010000 | -1.1180190000 | -0.1260340000 |
| C2   | -1.0075870000 | 0.4216400000  | -0.4826160000 |
| C3   | 0.3536980000  | 0.5073800000  | 0.3218480000  |
| C4   | 0.7641130000  | -0.9021550000 | -0.2728650000 |
| C5   | -0.9780070000 | -1.1026680000 | 1.4093290000  |
| H6   | -1.3364210000 | -1.9105220000 | -0.6532080000 |
| N7   | -0.8194910000 | 0.8636560000  | -1.8549070000 |
| C8   | -2.2130920000 | 1.1902000000  | 0.1013530000  |
| H9   | 1.0132160000  | 1.3669840000  | 0.1724510000  |
| C10  | -0.0855060000 | 0.1461990000  | 1.7516570000  |
| N11  | 1.3364670000  | -0.7517640000 | -1.6005410000 |
| C12  | 1.7367270000  | -1.7560010000 | 0.5693060000  |
| H13  | -2.0233510000 | -0.9793770000 | 1.7101560000  |
| H14  | -0.6216690000 | -2.0263870000 | 1.8764930000  |
| H15  | 0.7568140000  | -0.0962610000 | 2.4064990000  |
| H16  | -0.6439690000 | 0.9503010000  | 2.2402170000  |
| H17  | -2.0226670000 | 2.2661250000  | 0.0009640000  |
| H18  | -3.1275550000 | 0.9686460000  | -0.4558860000 |
| H19  | -2.4168790000 | 0.9895380000  | 1.1539260000  |
| H20  | 2.7195890000  | -1.2681790000 | 0.5670920000  |
| H21  | 1.4405250000  | -1.8932910000 | 1.6100440000  |
| H22  | 1.8666850000  | -2.7502480000 | 0.1331880000  |
| C23  | 1.8501200000  | -1.6644720000 | -2.3396590000 |
| C24  | -1.7161410000 | 1.0039990000  | -2.7600630000 |
| N25  | 2.7862200000  | -1.2808130000 | -3.3243210000 |
| N26  | 1.6374170000  | -3.0595060000 | -2.3359960000 |
| N27  | -2.9815670000 | 0.3907500000  | -2.8841470000 |
| N28  | -1.4645680000 | 1.9011780000  | -3.8197380000 |
| C29  | 2.5849680000  | -1.7370650000 | -4.6967510000 |
| C30  | 3.2993160000  | 0.0802590000  | -3.2467120000 |
| C31  | 2.7507750000  | -3.9951500000 | -2.3586770000 |
| C32  | 0.3511030000  | -3.6341340000 | -2.0109390000 |
| C33  | -4.1759600000 | 1.1696830000  | -3.1705220000 |
| C34  | -3.2177840000 | -0.9659020000 | -2.4438970000 |
| C35  | -1.6419740000 | 1.4366740000  | -5.1923090000 |
| C36  | -0.3322010000 | 2.8034420000  | -3.6642050000 |
| H37  | 1.9027290000  | -1.0683430000 | -5.2509970000 |
| H38  | 3.5450910000  | -1.7577360000 | -5.2266890000 |
| H39  | 2.1607680000  | -2.7420650000 | -4.7046510000 |
| H40  | 4.1944970000  | 0.1497760000  | -3.8765220000 |
| H41  | 2.5634360000  | 0.8254670000  | -3.5848840000 |
| H42  | 3.5614010000  | 0.3187790000  | -2.2149200000 |
| H43  | 2.8587390000  | -4.5085300000 | -1.3880340000 |
| H44  | 2.6035560000  | -4.7669230000 | -3.1296390000 |
| H45  | 3.6764250000  | -3.4590200000 | -2.5717150000 |
| H46  | 0.2169610000  | -4.5570860000 | -2.5921480000 |
| H47  | 0.2335670000  | -3.8908650000 | -0.9445570000 |
| H48  | -0.4431260000 | -2.9405350000 | -2.2897640000 |
| H49  | -4.8343230000 | 1.2286930000  | -2.2869880000 |
| H50  | -3.8934520000 | 2.1826810000  | -3.4598180000 |
| H51  | -4.7562190000 | 0.7169490000  | -3.9890290000 |
| H52  | -3.9642350000 | -1.4295070000 | -3.1039930000 |
| H53  | -2.2951800000 | -1.5426960000 | -2.5183410000 |
| H54  | -3.5948430000 | -1.0396170000 | -1.4098150000 |
| H55  | -0.7323410000 | 0.9395340000  | -5.5732400000 |
| H56  | -2.4689490000 | 0.7275490000  | -5.2489700000 |
| H57  | -1.8637790000 | 2.2875940000  | -5.8480780000 |
| H58  | -0.4284810000 | 3.6114320000  | -4.3997110000 |

|     |               |              |               |
|-----|---------------|--------------|---------------|
| H59 | -0.3310740000 | 3.2257790000 | -2.6583570000 |
| H60 | 0.6325750000  | 2.2954170000 | -3.8142110000 |

## 10H<sup>+</sup>

SCF ENERGY at B3LYP/6-311+G\*\* = -1036.70252 au

ZPVE = 347.887 kcal/mol

| atom | x             | y             | z             |
|------|---------------|---------------|---------------|
| C1   | -0.8831420000 | -1.1442130000 | -0.0801500000 |
| C2   | -1.0247580000 | 0.3925090000  | -0.5105700000 |
| C3   | 0.3652630000  | 0.4508290000  | 0.2503950000  |
| C4   | 0.6816650000  | -1.0059150000 | -0.2805320000 |
| C5   | -0.9920740000 | -1.0571540000 | 1.4570550000  |
| H6   | -1.4485140000 | -1.9407360000 | -0.5673160000 |
| N7   | -0.8144250000 | 0.7269340000  | -1.9251980000 |
| C8   | -2.1556780000 | 1.2580520000  | 0.0694730000  |
| H9   | 1.0594430000  | 1.2742700000  | 0.0558060000  |
| C10  | -0.0403440000 | 0.1683480000  | 1.7078800000  |
| N11  | 1.1296090000  | -0.9337000000 | -1.6932400000 |
| C12  | 1.6716660000  | -1.8654430000 | 0.5111340000  |
| H13  | -2.0183550000 | -0.8809230000 | 1.7893960000  |
| H14  | -0.6518140000 | -1.9725990000 | 1.9504110000  |
| H15  | 0.8113340000  | -0.0689220000 | 2.3505300000  |
| H16  | -0.5471580000 | 1.0216910000  | 2.1639740000  |
| H17  | -1.8848100000 | 2.3141550000  | -0.0502940000 |
| H18  | -3.0965460000 | 1.1012370000  | -0.4606640000 |
| H19  | -2.3512170000 | 1.0878530000  | 1.1276790000  |
| H20  | 2.6930040000  | -1.5012130000 | 0.3442620000  |
| H21  | 1.4882650000  | -1.8270520000 | 1.5828890000  |
| H22  | 1.6401690000  | -2.9186080000 | 0.2243410000  |
| C23  | 1.8686890000  | -1.7702900000 | -2.4260890000 |
| C24  | -1.7486850000 | 0.9875400000  | -2.7997540000 |
| N25  | 2.6979420000  | -1.2363880000 | -3.3625090000 |
| N26  | 1.8153410000  | -3.1235120000 | -2.2976960000 |
| N27  | -3.0531800000 | 0.5121960000  | -2.8137360000 |
| N28  | -1.4386410000 | 1.8265930000  | -3.8570940000 |
| C29  | 2.9616730000  | -1.8914290000 | -4.6464510000 |
| C30  | 3.2316250000  | 0.1222020000  | -3.2353560000 |
| C31  | 3.0017540000  | -3.9729940000 | -2.4188850000 |
| C32  | 0.5660520000  | -3.8267520000 | -2.0105180000 |
| C33  | -4.1939500000 | 1.3667580000  | -3.1356430000 |
| C34  | -3.3861400000 | -0.8239450000 | -2.3511190000 |
| C35  | -1.9097670000 | 1.5736200000  | -5.2163440000 |
| C36  | -0.2922450000 | 2.7176680000  | -3.7708740000 |
| H37  | 2.7504490000  | -1.1838980000 | -5.4562860000 |
| H38  | 4.0087710000  | -2.2059540000 | -4.7269210000 |
| H39  | 2.3139740000  | -2.7595940000 | -4.7686390000 |
| H40  | 4.2679860000  | 0.1262560000  | -3.5889290000 |
| H41  | 2.6571200000  | 0.8378750000  | -3.8363180000 |
| H42  | 3.2091070000  | 0.4361580000  | -2.1913090000 |
| H43  | 3.0698280000  | -4.6153720000 | -1.5329770000 |
| H44  | 2.9503520000  | -4.6151730000 | -3.3063640000 |
| H45  | 3.9011440000  | -3.3587960000 | -2.4697250000 |
| H46  | 0.4299940000  | -4.6234500000 | -2.7515300000 |
| H47  | 0.5749940000  | -4.2839150000 | -1.0138150000 |
| H48  | -0.2724230000 | -3.1355360000 | -2.0797290000 |
| H49  | -4.8856740000 | 1.4058250000  | -2.2823320000 |
| H50  | -3.8529920000 | 2.3804270000  | -3.3482600000 |
| H51  | -4.7489700000 | 0.9879620000  | -4.0045510000 |
| H52  | -4.1800790000 | -1.2312110000 | -2.9889280000 |
| H53  | -2.5134170000 | -1.4729600000 | -2.4375670000 |
| H54  | -3.7449860000 | -0.8475720000 | -1.3111400000 |
| H55  | -1.0630390000 | 1.3093080000  | -5.8671900000 |

|     |               |               |               |
|-----|---------------|---------------|---------------|
| H56 | -2.6204570000 | 0.7472560000  | -5.2247560000 |
| H57 | -2.3953440000 | 2.4628130000  | -5.6373750000 |
| H58 | -0.4880290000 | 3.6080170000  | -4.3792590000 |
| H59 | -0.1295400000 | 3.0145280000  | -2.7347010000 |
| H60 | 0.6295080000  | 2.2456420000  | -4.1465880000 |
| H61 | 0.7265780000  | -0.0945060000 | -2.1575330000 |
